# Supplementary material for: Adsorption of Milk Proteins (β-Casein and β-Lactoglobulin) and BSA onto Hydrophobic Surfaces
Source: PubMed Central journal article supplement (PMC5578259; doi:10.3390/ma10080893), 2017-08-02
Supplement: materials-10-00893-s001.pdf [file materials-10-00893-s001.pdf]

# Electronic Supporting Information: Adsorption of milk proteins ( $\beta$ -casein and $\beta$ -lactoglobulin) and BSA onto hydrophobic surfaces

Leonor Pérez-Fuentes<sup>1,\*</sup>, Carlos Drummond<sup>2,3</sup>, Jordi Faraudo<sup>4</sup>, and Delfi Bastos-González<sup>1</sup>

<sup>1</sup>Biocolloid and Fluid Physics Group, Department of Applied Physics, University of Granada, Av. Fuentenueva 2, E-18001 Granada, Spain.

<sup>2</sup>CNRS, Centre de Recherche Paul Pascal (CRPP), UPR 8641, F3300 Pessac, France, Université de Bordeaux, CRPP, UPR 8641, F-33600 Pessac, France.

<sup>3</sup>Université de Bordeaux, CRPP, UPR 8641, F-33600 Pessac, France.

<sup>4</sup>Institut de Ciència de Materials de Barcelona (ICMAB-CSIC), Campus de la UAB, E-08193 Bellaterra, Barcelona, Spain. E-mail: jfaraudo@icmab.es

## Materials and Methods

In the experimental part, we used several buffered solutions. The details of the composition of the buffers are presented below:

**Table S1.** Composition of buffered solutions

| pH | Component                        | Salt concentration (mM) | Ionic strength (mM) |
|----|----------------------------------|-------------------------|---------------------|
| 4  | AcH                              | 13.50                   | 2.01                |
| 5  | AcH                              | 3.15                    | 2.00                |
| 6  | NaH <sub>2</sub> PO <sub>4</sub> | 1.79                    | 2.00                |
| 7  | NaH <sub>2</sub> PO <sub>4</sub> | 1.13                    | 2.01                |
| 8  | H <sub>3</sub> BO <sub>3</sub>   | 15.00                   | 0.82                |
| 9  | H <sub>3</sub> BO <sub>3</sub>   | 5.14                    | 1.90                |
| 10 | H <sub>3</sub> BO <sub>3</sub>   | 2.20                    | 1.98                |

All solutions were prepared with double distilled and deionized (Milli-Q) water. The desired pH was achieved by addition of few droplets of a NaOH solution (this component is taken into account for the calculation of ionic strength). In the case of the buffer for preparing  $\beta$ -casein solution, we used 10 mM of Bis-Tris and the pH was adjusted with dilute HCl (2.40 mM of ionic strength).

## Results

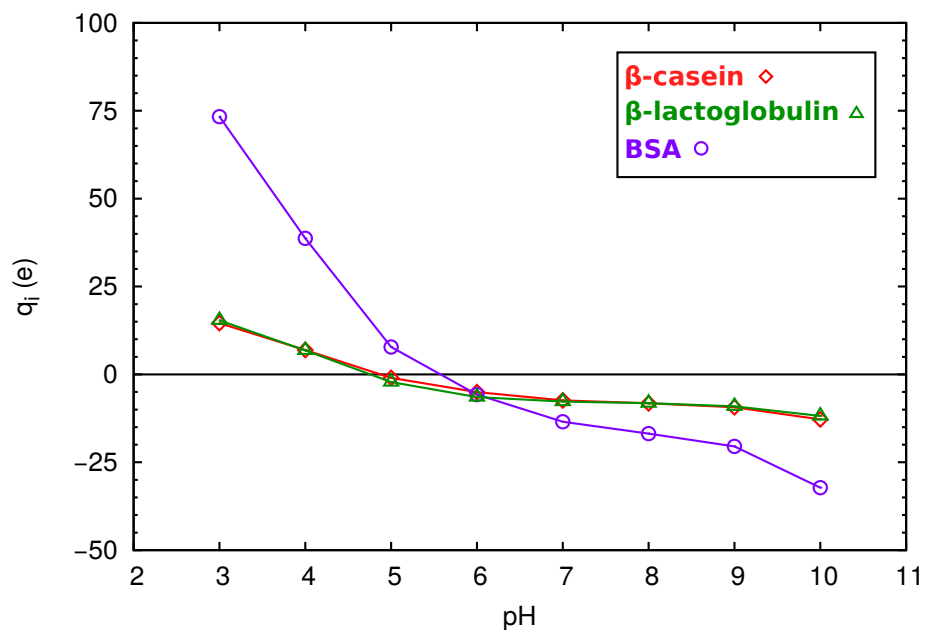

**Figure S1.** Charges (in units of electronic charge) for each protein molecule as a function of pH. The electrostatic charge of the proteins has been calculated from the 3D structures equilibrated in implicit water (PropKa calculation).

**Table S2.** Secondary structure ( $\beta$ -sheet and  $\alpha$ -helix content) of  $\beta$ -casein protein obtained in MD simulations in bulk or adsorbed onto surfaces of different charge and different pH

| Simulation              | $\beta$ -sheet | $\alpha$ -helix |
|-------------------------|----------------|-----------------|
| Bulk (pH=7)             | 77%            | 8%              |
| Neutral surface (pH=7)  | 40%            | 43%             |
| Negative surface (pH=7) | 37%            | 44%             |
| Negative surface (pH=4) | 36%            | 45%             |

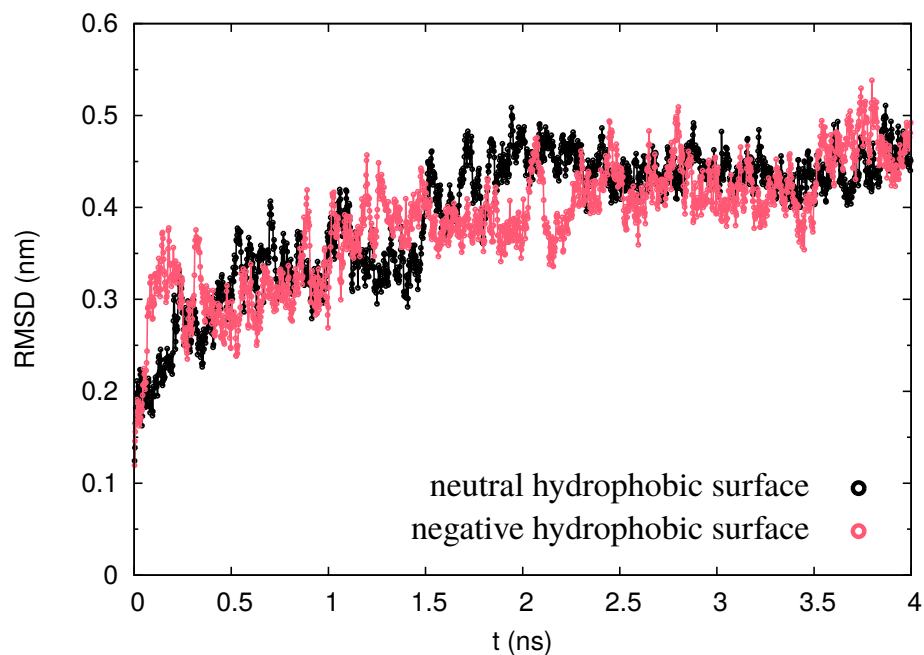

**Figure S2.** Time evolution of the root mean squared deviation (RMSD) between the  $\beta$ -casein structure in solution and adsorbed onto a neutral hydrophobic surface or a negative hydrophobic surface.

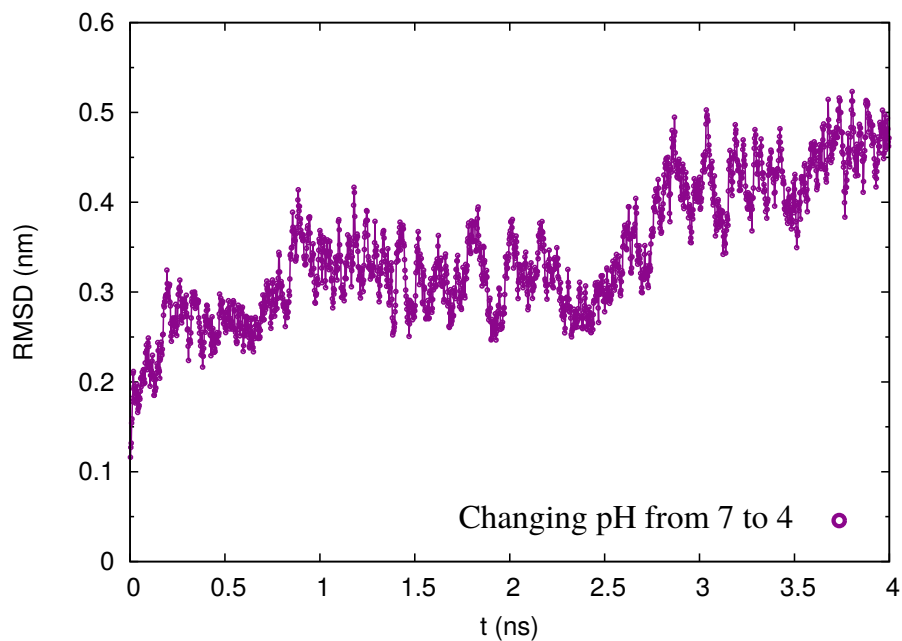

**Figure S3.** Time evolution of the root mean squared deviation (RMSD) of the  $\beta$ -casein structure adsorbed onto a negative hydrophobic surface from pH 7 to pH 4.

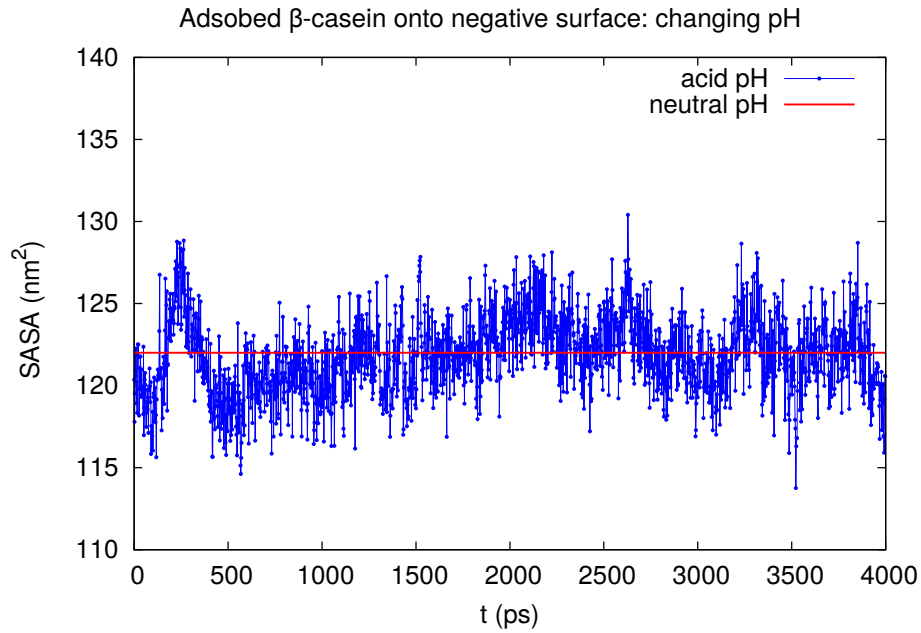

**Figure S4.** Time evolution of the solvent-accessible surface area (SASA) between the  $\beta$ -casein structure adsorbed onto a negative hydrophobic surface from pH 7 to pH 4.

**Table S3.** Values of critical charge density ( $\sigma_{crit}$ ) using Manning model, eqn (11), and Bocquet *et al.* model, eqn (12), calculated for spherical colloids ( $a_{anionic}=80$  nm) and ( $a_{cationic}=255$  nm) immersed in different buffered solutions

| pH | Ionic concentration (mM) | Anionic latex                                  |                                                              | Cationic latex                                 |                                                              |
|----|--------------------------|------------------------------------------------|--------------------------------------------------------------|------------------------------------------------|--------------------------------------------------------------|
|    |                          | Manning $ \sigma_{crit} $ (e/nm <sup>2</sup> ) | Bocquet <i>et al.</i> $ \sigma_{crit} $ (e/nm <sup>2</sup> ) | Manning $ \sigma_{crit} $ (e/nm <sup>2</sup> ) | Bocquet <i>et al.</i> $ \sigma_{crit} $ (e/nm <sup>2</sup> ) |
| 3  | 1.00                     | 0.068                                          | 0.052                                                        | 0.063                                          | 0.048                                                        |
| 4  | 2.01                     | 0.080                                          | 0.071                                                        | 0.076                                          | 0.067                                                        |
| 5  | 2.00                     | 0.080                                          | 0.071                                                        | 0.076                                          | 0.067                                                        |
| 6  | 1.90                     | 0.080                                          | 0.071                                                        | 0.076                                          | 0.067                                                        |
| 7  | 1.57                     | 0.080                                          | 0.071                                                        | 0.076                                          | 0.067                                                        |
| 8  | 0.82                     | 0.064                                          | 0.048                                                        | 0.059                                          | 0.044                                                        |
| 9  | 1.90                     | 0.079                                          | 0.069                                                        | 0.075                                          | 0.066                                                        |
| 10 | 1.98                     | 0.071                                          | 0.074                                                        | 0.076                                          | 0.067                                                        |
